# Supplementary material for: Differences in stress reactivity between zebrafish with alternative stress coping styles
Source: R Soc Open Sci. 2019 May 22;6(5):181797. doi: 10.1098/rsos.181797 (PMC6549991; doi:10.1098/rsos.181797)
Supplement: Table S1 [file rsos181797supp3.xlsx]

## Sheet: Sheet1
Supplementary Dataset for "Differences in stress reactivity between zebrafish with alternative stress coping styles" by Wong, French, & Russ published in Royal Society Open Science	Cells highlighted in yellow represent fish where time criteria was not applied
Line (HSB = reactive; LSB = proactive)	Fish ID	Sex	Time Point	Cortisol (ng / g body weight)	Time in upper zone for first 6 minutes (sec)	Percentage of time in upper zone for entire trial (%)	Movement (cm / min trial time)
HSB	1	Male	0	6.79
HSB	2	Female	0	0.57
HSB	3	Female	0	1.18
HSB	4	Female	0	2.99
HSB	5	Female	0	4.84
HSB	6	Female	0	0.74
HSB	7	Female	0	0.58
HSB	8	Female	0	5.4
HSB	9	Male	0	2.3
HSB	10	Female	0	0.7
HSB	11	Male	0	1.5
HSB	12	Male	0	1.38
LSB	1	Male	0	12.22
LSB	2	Male	0	1.08
LSB	3	Female	0	0.93
LSB	4	Male	0	8.19
LSB	5	Female	0	0.92
LSB	6	Male	0	1.41
LSB	7	Female	0	1.87
LSB	8	Female	0	2.99
LSB	9	Female	0	3.27
LSB	10	Female	0	2.89
LSB	11	Female	0	2.52
LSB	12	Male	0	1.57
HSB	1	Male	6	16.95	105.2	29.22	102.58
HSB	2	Female	6	14.14	0	0	9.14
HSB	3	Male	6	12.82	9.78	2.72	185.42
HSB	4	Male	6	22.23	42.21	11.73	136.9
HSB	5	Female	6	43.28	0	0	2.39
HSB	6	Female	6	8.95	131.13	36.43	280.01
HSB	7	Male	6	20.13	99	27.5	31.47
HSB	8	Female	6	29.97	0	0	5.83
HSB	9	Female	6	7.66	0.73	0.2	8.98
HSB	10	Female	6	4.17	0	0	16.68
HSB	11	Male	6	17.15	59.83	16.62	106.18
HSB	12	Male	6	16.65	0	0	16.62
HSB	1	Male	6	23.94	254.38	70.66	348.49
HSB	2	Male	6	26.53	0	0	8.94
HSB	3	Female	6	13.23	55.35	15.38	110.16
HSB	4	Female	6	44.87	243.01	67.5	244.67
HSB	5	Female	6	10.35	165.1	45.86	182.69
HSB	6	Female	6	1.25	0	0	4.73
HSB	7	Male	6	27.26	73.61	20.45	438.47
HSB	8	Female	6	35.58	94.63	26.29	362.11
HSB	9	Male	6	20.65	80.08	22.24	149.61
HSB	10	Male	6	20.24	157.99	43.89	142.11
HSB	11	Male	6	39.35	100.87	28.02	251.14
HSB	12	Female	6	4.2	0	0	30.11
LSB	1	Female	6	2.89	237.47	65.96	270.54
LSB	2	Female	6	2.99	260.56	72.38	249.94
LSB	3	Male	6	4.82	251.35	69.82	147.79
LSB	4	Male	6	25.74	261.39	72.61	237.74
LSB	5	Female	6	1.02	156.85	43.57	157.91
LSB	6	Male	6	12.76	214.11	59.48	266.56
LSB	7	Male	6	5.85	358.82	99.67	69.52
LSB	8	Male	6	19.58	208.8	58	226.62
LSB	9	Female	6	12.05	218.35	60.65	272.91
LSB	10	Female	6	2.85	195.66	54.35	171.35
LSB	11	Male	6	18.31	198.19	55.05	244.96
LSB	12	Female	6	17.23	207.47	57.63	250.82
LSB	1	Male	6	22.63	9.38	2.61	147.17
LSB	2	Male	6	10.96	127.56	35.43	246.59
LSB	3	Female	6	22.69	24.16	6.71	241.06
LSB	4	Male	6	15.87	22.12	6.14	223.74
LSB	5	Male	6	17.72	294.99	81.94	184.88
LSB	6	Female	6	0.78	299.43	83.18	188.96
LSB	7	Female	6	9.42	114.51	31.81	316.08
LSB	8	Male	6	6.52	73.37	20.38	317.86
LSB	9	Female	6	2.29	81.35	22.6	201.74
LSB	10	Female	6	3.4	176.27	48.96	172.91
LSB	11	Male	6	16.15	169.3	47.03	221.06
LSB	12	Female	6	4	110.71	30.75	73.84
HSB	1	Female	30	8.78	20.85	1.18	171.3
HSB	2	Female	30	17.56	0	9.33	236.19
HSB	3	Female	30	7.94	0	0	74.26
HSB	4	Female	30	16.39	13.08	16.67	220.32
HSB	5	Male	30	4.64	0	1.81	222.78
HSB	6	Male	30	11.86	0	17.57	285.76
HSB	7	Male	30	23.11	0.87	4.55	295.57
HSB	8	Female	30	8.69	2.2	0.22	96.45
HSB	9	Female	30	6.1	0	2.81	134.3
HSB	10	Female	30	4.97	11.08	7.8	241.25
HSB	11	Female	30	8.47	0	1.58	119.55
HSB	12	Male	30	7.76	0.63	0.08	61.42
LSB	1	Female	30	10.28	133.5	30.86	273
LSB	2	Male	30	1.16	120.05	21.72	313.99
LSB	3	Male	30	4.2	185.06	37.66	372.8
LSB	4	Female	30	3.52	209.12	30.11	253.95
LSB	5	Male	30	19.96	169.88	58.73	644.5
LSB	6	Male	30	22.14	180.45	76.98	385.15
LSB	7	Female	30	5.61	81.21	17.36	291.19
LSB	8	Female	30	5.07	218.16	42.06	288.14
LSB	9	Male	30	9.4	180.68	40.2	336.66
LSB	10	Female	30	0.41	221.56	54.83	422.88
LSB	11	Male	30	18.51	138.04	47.49	462.18
LSB	12	Male	30	18.61	204.55	55.18	346.36
